# Supplementary material for: Dynamics of IgG antibody response against Plasmodium antigens among Nigerian infants and young children
Source: PubMed Central journal article supplement (PMC10484571; doi:10.3389/fimmu.2023.1208822), 2023-08-24
Supplement: DataSheet_1.pdf [file DataSheet_1.pdf]

## *Supplementary Material*

### Dynamics of IgG antibody response against *Plasmodium* antigens among Nigerian infants and young children

**Supplementary Table 1. Antigens utilized for IgG capture or assay control in this study.**

| <b>Microbe Species</b>       | <b>Antigen</b>                                 | <b>Alias</b>         | <b>Infection stage expression</b> |
|------------------------------|------------------------------------------------|----------------------|-----------------------------------|
| <i>Plasmodium falciparum</i> | merozoite surface protein 1, 19kD fragment     | PfMSP1               | Blood stage                       |
| <i>Plasmodium falciparum</i> | apical membrane antigen, N terminal region     | AMA1                 | Blood stage                       |
| <i>Plasmodium falciparum</i> | Gutamate-rich protein, R <sub>0</sub> fragment | GLURP-R <sub>0</sub> | Blood stage                       |
| <i>Plasmodium falciparum</i> | circumsporozoite protein, (NANP)x5             | CSP                  | Sporozoite stage                  |
| <i>Plasmodium falciparum</i> | liver stage antigen 1, P11043 epitope          | LSA1                 | Liver stage                       |
| <i>Plasmodium malariae</i>   | merozoite surface protein 1, 19kD fragment     | PmMSP1               | Blood stage                       |
| <i>Plasmodium ovale</i>      | merozoite surface protein 1, 19kD fragment     | PoMSP1               | Blood stage                       |
| <i>Plasmodium vivax</i>      | merozoite surface protein 1, 19kD fragment     | PvMSP1               | Blood stage                       |
| <i>Schistosoma japonicum</i> | Glutathione-S-transferase                      | GST                  | NA                                |

**Supplementary Table 2. Children with serology data available and *Plasmodium falciparum* transmission intensity by state: Nigeria, 2018.**

| <b>STATE</b>              | <b>Number of samples<br/>for analysis</b> | <b>Transmission<br/>intensity*</b> |
|---------------------------|-------------------------------------------|------------------------------------|
| Abia                      | 202                                       | Low                                |
| Adamawa                   | 215                                       | High                               |
| Akwa Ibom                 | 271                                       | High                               |
| Anambra                   | 286                                       | Low                                |
| Bauchi                    | 421                                       | High                               |
| Bayelsa                   | 141                                       | Low                                |
| Benue                     | 311                                       | Low                                |
| Borno                     | 163                                       | Low                                |
| Cross River               | 188                                       | High                               |
| Delta                     | 258                                       | Low                                |
| Ebonyi                    | 208                                       | High                               |
| Edo                       | 210                                       | Low                                |
| Ekiti                     | 110                                       | High                               |
| Enugu                     | 206                                       | High                               |
| Federal Capital Territory | 74                                        | Low                                |
| Gombe                     | 267                                       | High                               |
| Imo                       | 339                                       | Low                                |
| Jigawa                    | 427                                       | High                               |
| Kaduna                    | 563                                       | High                               |
| Kano                      | 456                                       | Low                                |
| Katsina                   | 486                                       | High                               |
| Kebbi                     | 290                                       | High                               |
| Kogi                      | 136                                       | Low                                |
| Kwara                     | 138                                       | High                               |
| Lagos                     | 459                                       | Low                                |
| Nasarawa                  | 136                                       | Low                                |
| Niger                     | 396                                       | High                               |
| Ogun                      | 175                                       | Low                                |
| Ondo                      | 144                                       | Low                                |
| Osun                      | 119                                       | High                               |
| Oyo                       | 308                                       | Low                                |
| Plateau                   | 220                                       | Low                                |
| Rivers                    | 288                                       | Low                                |
| Sokoto                    | 282                                       | High                               |
| Taraba                    | 232                                       | High                               |
| Yobe                      | 192                                       | High                               |

---

\* For the purposes of this study, state at or above the median of seropositivity to PfMSP1 among children <5 years was considered a high transmission area

**Supplementary Table 3. Seropositivity and loss of anti-*Plasmodium falciparum* IgG antibodies during the first 6 months of life by *P. falciparum* transmission setting.**

| <b>Antigen and <i>P. falciparum</i> transmission setting</b> | <b>Seropositivity of neonates &lt;1 month (% , 95% CI)</b> | <b>Log-transformed IgG level at &lt;1 month old</b> | <b>p-value &lt;1 month old*</b> | <b>Log-transformed IgG level at 6 months of age</b> | <b>p-value 6 month old*</b> | <b>Percent change: &lt;1 vs 6 months</b> |
|--------------------------------------------------------------|------------------------------------------------------------|-----------------------------------------------------|---------------------------------|-----------------------------------------------------|-----------------------------|------------------------------------------|
| <b>AMA1</b>                                                  |                                                            |                                                     |                                 |                                                     |                             |                                          |
| High                                                         | 93.3 (66.0, 99.7)                                          | 10.7                                                | 0.63                            | 8.62                                                | <0.001                      | -19.4%                                   |
| Low                                                          | 85.7 (42.0, 99.2)                                          | 10.8                                                |                                 | 5.29                                                |                             | -51.0%                                   |
| <b>PfMSP1</b>                                                |                                                            |                                                     |                                 |                                                     |                             |                                          |
| High                                                         | 93.3 (66.0, 99.7)                                          | 10.80                                               | 0.39                            | 8.32                                                | <0.001                      | -23.0%                                   |
| Low                                                          | 85.7 (42.0, 99.2)                                          | 9.74                                                |                                 | 3.07                                                |                             | -68.5%                                   |
| <b>CSP</b>                                                   |                                                            |                                                     |                                 |                                                     |                             |                                          |
| High                                                         | 73.3 (44.8, 91.1)                                          | 7.07                                                | 0.78                            | 3.47                                                | 0.17                        | -50.9%                                   |
| Low                                                          | 57.1 (20.2, 88.2)                                          | 7.66                                                |                                 | 3.38                                                |                             | -55.9%                                   |
| <b>LSA1</b>                                                  |                                                            |                                                     |                                 |                                                     |                             |                                          |
| High                                                         | 46.7 (22.3, 72.6)                                          | 3.97                                                | 0.67                            | 2.56                                                | <0.001                      | -35.5%                                   |
| Low                                                          | 42.9 (11.8, 79.8)                                          | 3.30                                                |                                 | 1.79                                                |                             | -45.8%                                   |
| <b>GLURP-R<sub>0</sub></b>                                   |                                                            |                                                     |                                 |                                                     |                             |                                          |
| High                                                         | 53.3 (27.4, 77.7)                                          | 4.76                                                | 0.53                            | 2.67                                                | 0.01                        | -43.9%                                   |
| Low                                                          | 42.9 (11.8, 79.8)                                          | 4.74                                                |                                 | 2.20                                                |                             | -19.7%                                   |

\*p-values calculated for difference in IgG between relatively higher and lower transmission settings using a pairwise Wilcoxon rank-sum test

**Supplementary Table 4. Comparison of mother vs. children *Plasmodium falciparum* HRP2 antigenemia among infants under 6 months of age.**

|       |       | Mother |       |
|-------|-------|--------|-------|
|       |       | HRP2+  | HRP2- |
| Child | HRP2+ | 3      | 5     |
|       | HRP2- | 9      | 49    |

**Supplementary Table 5. IgG seropositivity by *Plasmodium falciparum* HRP2 antigenemia among infants under 2 months of age.**

| <b>Antibody Target</b>        | <b>Overall percent seropositive</b> | <b>HRP2 antigen positive (n=14)</b> | <b>HRP2 antigen negative (n= 90)</b> | <b>p-value*</b> |
|-------------------------------|-------------------------------------|-------------------------------------|--------------------------------------|-----------------|
| <i>P. falciparum</i> AMA1     | 96.2%                               | 92.9%                               | 96.7%                                | 0.49            |
| <i>P. falciparum</i> MSP1     | 92.3%                               | 100.0%                              | 91.1%                                | 0.23            |
| <i>P. falciparum</i> CSP      | 46.2%                               | 50.0%                               | 45.7%                                | 0.79            |
| <i>P. falciparum</i> GLURP-R0 | 41.4%                               | 35.4%                               | 42.3%                                | 0.59            |
| <i>P. falciparum</i> LSA1     | 36.7%                               | 50.2%                               | 34.5%                                | 0.29            |
| <i>P. malariae</i> MSP1       | 47.3%                               | 57.3%                               | 45.7%                                | 0.44            |
| <i>P. ovale</i> MSP1          | 13.5%                               | 14.2%                               | 13.4%                                | 0.94            |
| <i>P. vivax</i> MSP1          | 4.8%                                | 14.2%                               | 3.3%                                 | 0.07            |

\*p-values calculated using Pearson's chi-square with Rao and Scott adjustment.

**Supplementary Table 6. *Plasmodium falciparum* HRP2 antigenemia among children under 2 years stratified by maternal IgG tertiles and categorized by child's age.**

| Maternal Tertile                  | <u>0-5 months</u> |                   | <u>6-11 months</u> |                   | <u>12- 17 months</u> |                   | <u>18- 23 months</u> |                   |
|-----------------------------------|-------------------|-------------------|--------------------|-------------------|----------------------|-------------------|----------------------|-------------------|
|                                   | <i>HRP2+</i> n(%) | <i>HRP2-</i> n(%) | <i>HRP2+</i> n(%)  | <i>HRP2-</i> n(%) | <i>HRP2+</i> n(%)    | <i>HRP2-</i> n(%) | <i>HRP2+</i> n(%)    | <i>HRP2-</i> n(%) |
| <b>Lowest tertile (AMA1)</b>      | 8 (15.5)          | 45 (84.9)         | 17 (20)            | 68 (80)           | 21 (17.6)            | 98 (82.4)         | 14 (20.3)            | 55 (79.7)         |
| <b>Middle tertile (AMA1)</b>      | 16 (26.7)         | 44 (73.3)         | 21 (23.6)          | 68 (76.4)         | 33 (32.0)            | 70 (68.0)         | 25 (34.2)            | 48 (65.8)         |
| <b>Highest tertile (AMA1)</b>     | 14 (20)           | 56 (80)           | 25 (29.8)          | 59 (70.2)         | 56 (44.4)            | 70 (55.6)         | 24 (42.9)            | 32 (57.1)         |
| <b>Lowest tertile (PfMSP1)</b>    | 13 (21.3)         | 48 (78.7)         | 15 (16.0)          | 79 (84.0)         | 25 (22.9)            | 84 (77.1)         | 12 (19.4)            | 50 (80.6)         |
| <b>Middle tertile (PfMSP1)</b>    | 9 (14.8)          | 52 (85.2)         | 21 (25.6)          | 61 (74.4)         | 42 (35.9)            | 75 (64.1)         | 22 (33.3)            | 44 (66.7)         |
| <b>Highest tertile (PfMSP1)</b>   | 16 (26.2)         | 45 (73.8)         | 27 (32.9)          | 55 (67.1)         | 43 (35.0)            | 80 (65.0)         | 29 (41.4)            | 41 (58.6)         |
| <b>Lowest tertile (GLURP-R0)</b>  | 12 (21.8)         | 43 (78.2)         | 12 (14.6)          | 70 (85.4)         | 24 (20.2)            | 95 (79.8)         | 18 (25.4)            | 53 (74.6)         |
| <b>Middle tertile (GLURP-R0)</b>  | 13 (16.0)         | 68 (84.0)         | 21 (26.6)          | 58 (73.4)         | 31 (29.2)            | 75 (70.8)         | 15 (25.0)            | 45 (75.0)         |
| <b>Highest tertile (GLURP-R0)</b> | 13 (27.7)         | 34 (72.3)         | 30 (30.9)          | 67 (69.1)         | 55 (44.0)            | 70 (56.0)         | 30 (44.8)            | 37 (55.2)         |
| <b>Lowest tertile (CSP)</b>       | 6 (10.2)          | 53 (89.8)         | 10 (12.1)          | 73 (88.0)         | 25 (20.5)            | 97 (79.5)         | 14 (22.2)            | 49 (77.8)         |
| <b>Middle tertile (CSP)</b>       | 10 (16.9)         | 49 (83.1)         | 18 (20.2)          | 71 (79.8)         | 32 (28.6)            | 80 (71.4)         | 20 (30.3)            | 46 (69.7)         |
| <b>Highest tertile (CSP)</b>      | 22 (33.8)         | 43 (66.2)         | 35 (40.7)          | 51 (59.3)         | 53 (45.7)            | 63 (54.3)         | 29 (42.0)            | 40 (58.0)         |
| <b>Lowest tertile (LSA1)</b>      | 14 (20.0)         | 56 (80.0)         | 9 (12.5)           | 63 (87.5)         | 32 (25.6)            | 93 (74.4)         | 9 (15.5)             | 49 (84.5)         |
| <b>Middle tertile (LSA1)</b>      | 8 (14.0)          | 49 (86.0)         | 29 (29.0)          | 71 (71.0)         | 42 (37.5)            | 70 (62.5)         | 23 (39.0)            | 36 (61.0)         |
| <b>Highest tertile (LSA1)</b>     | 16 (28.6)         | 40 (71.4)         | 25 (29.1)          | 61 (70.9)         | 36 (31.9)            | 77 (68.1)         | 31 (38.3)            | 50 (61.7)         |

**A**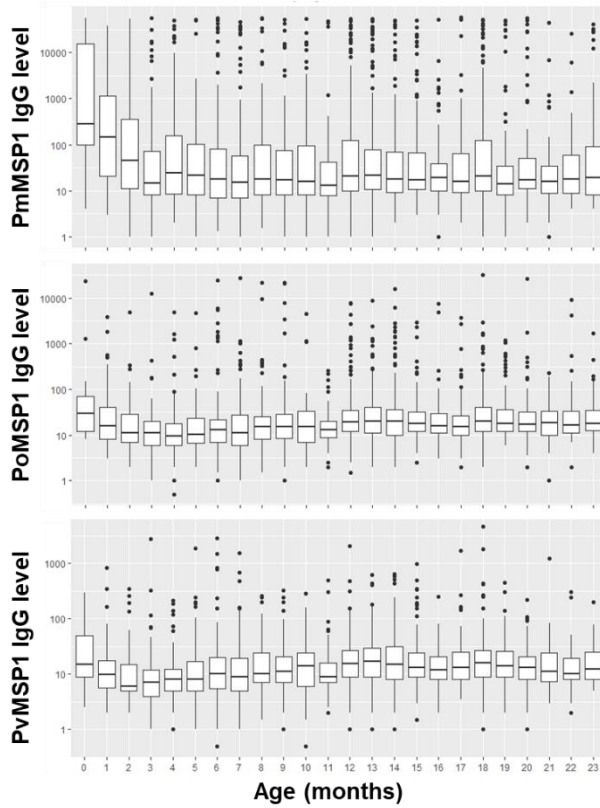**B**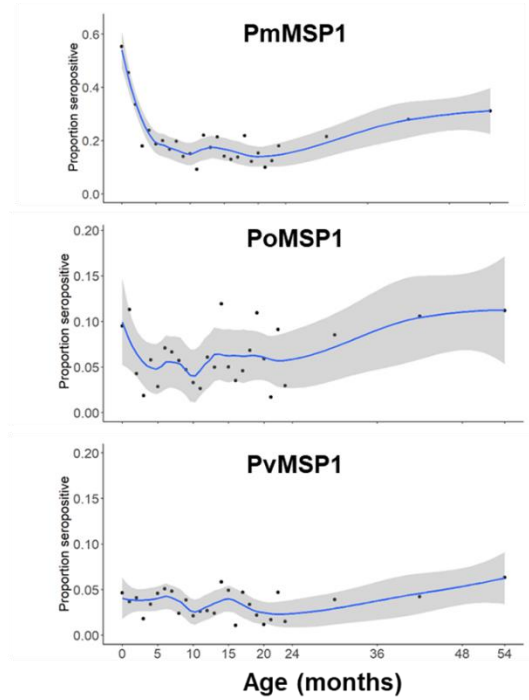

**Supplementary Figure 1. IgG levels and seropositivity to *Plasmodium malariae*, *P. ovale*, and *P. vivax* MSP1 antigens in children: Nigeria, 2018.** (A) IgG levels for children 0-23 months of age. Boxes display interquartile range (IQR) and whiskers extend 1.5x IQR above and below. Markers indicate observations outside of 1.5x IQR. Medians displayed by horizontal line. (B) IgG seropositivity by age to *P. falciparum* antigens for 0-59 month-old-children with smoothed LOESS regression curve (solid line) and 95% confidence intervals (shading).



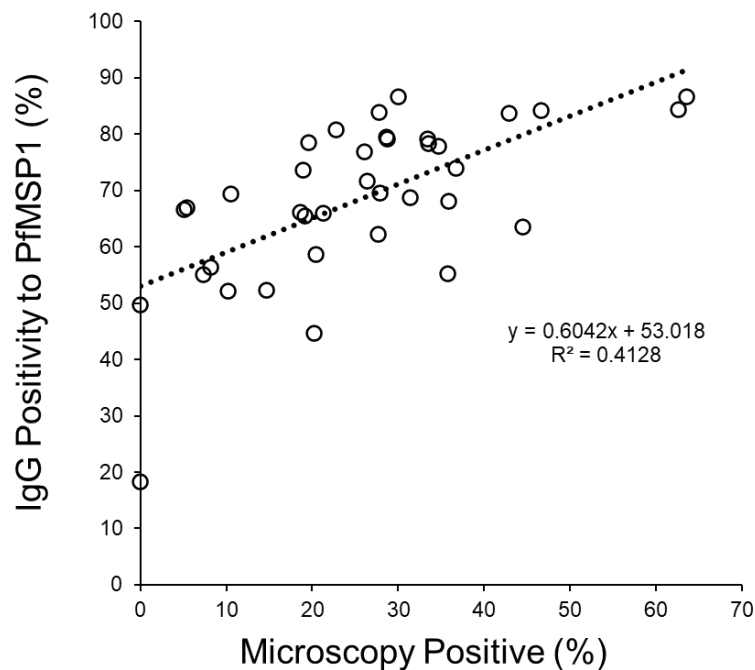

**Supplementary Figure 2. State-level comparison of active *P. falciparum* infection (by microscopy) to seropositivity to PfMSP1 antigen.** Scatterplot shows the percentage of children under 5 years microscopy positive for *P. falciparum* from previous cross-sectional survey compared with percent of children under 5 years from the current survey seropositive to the PfMSP1 antigen. Each marker in plot represents a state in Nigeria, and hashes line shows linear regression fitting with inset displaying regression estimates. State-level microscopy data obtained from the 2015 Nigeria Malaria Indicator survey ([dhsprogram.com/pubs/pdf/MIS20/MIS20.pdf](https://dhsprogram.com/pubs/pdf/MIS20/MIS20.pdf)).

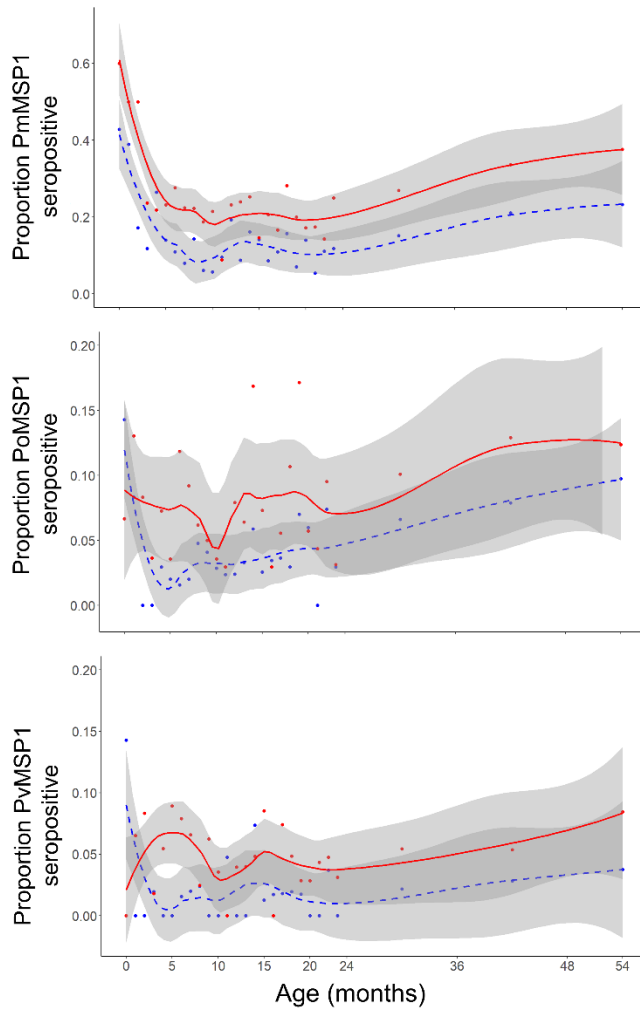

**Supplementary Figure 3. Locally-smoothed seropositivity to non-*falciparum* antigens by *Plasmodium falciparum* transmission intensity.** LOESS regression was used to estimate the smoothed regression curves with blue hashed lines indicating lower transmission areas and red solid lines higher transmission area. Grey shading around LOESS curves indicates the 95% confidence interval.

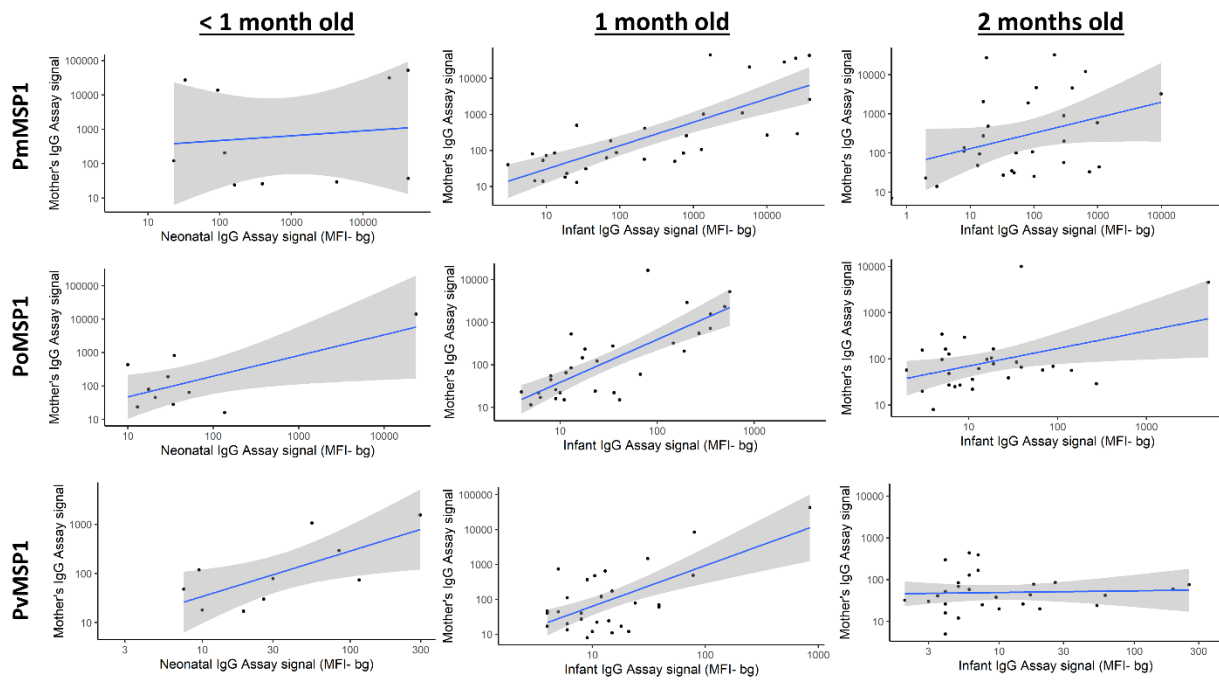

**Supplementary Figure 4. Scatterplots of maternal and young infants' anti-malarial IgG levels against non-falciparum antigens.** Solid line shows linear regression fitting for the data with shading indicating the 95% confidence interval.

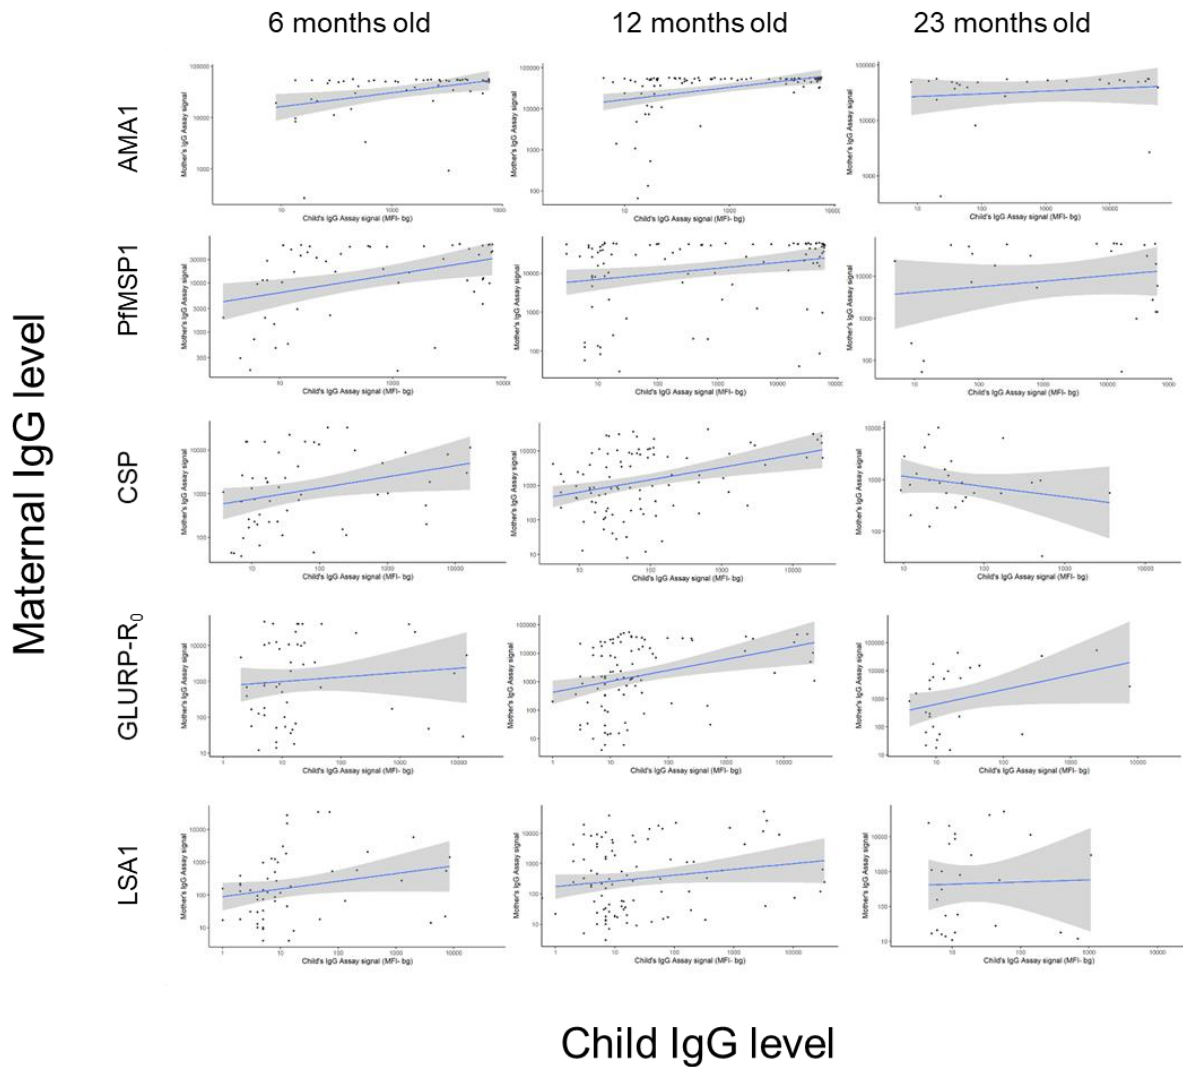

**Supplementary Figure 5. Scatterplots of maternal and children’s anti-malarial IgG levels against *P. falciparum* antigens for older infants and young children up to 2 years of age. Solid line shows linear regression fitting for the data with shading indicating the 95% confidence interval.**

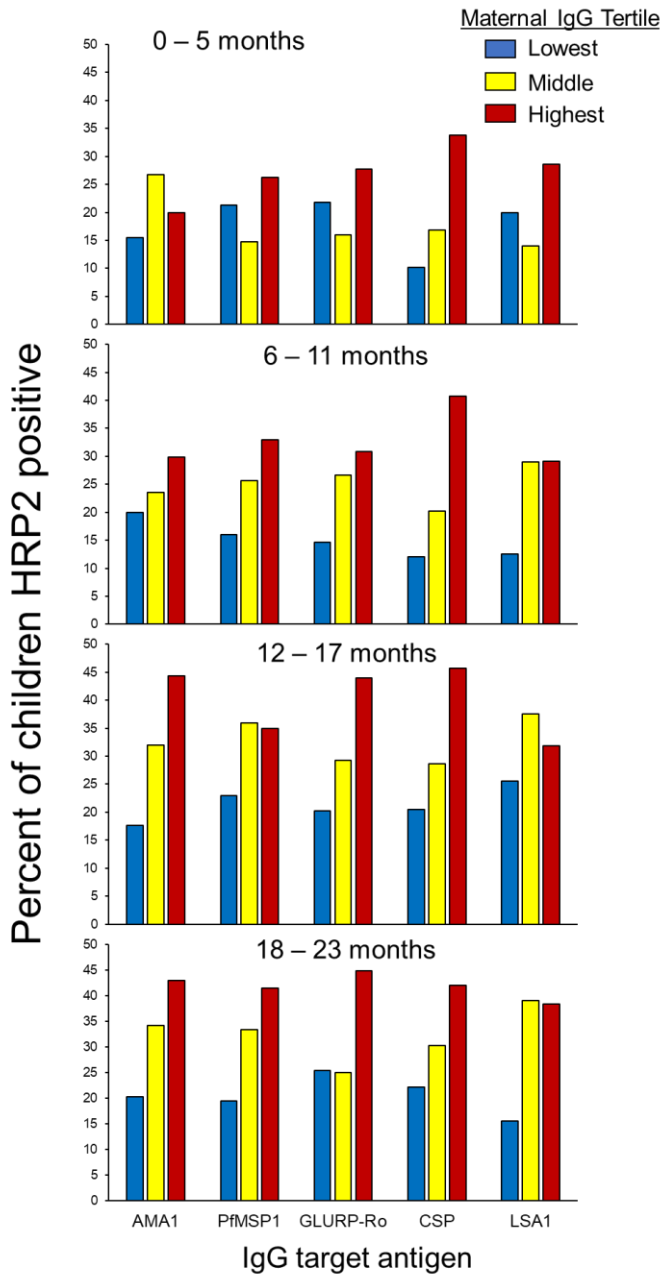

**Supplementary Figure 6. Percentage of children positive for HRP2 antigen by maternal IgG levels for the five *P. falciparum* antigens.** Plots separated by child age categories, and bar colors indicate maternal IgG tertile to each *P. falciparum* antigen. Each plot's y-axis is the percentage of children who are HRP2 antigen positive.
